# Supplementary material for: Meiotic viral attenuation through an ancestral apoptotic pathway
Source: PubMed Central journal article supplement — Proc Natl Acad Sci U S A. 2019 Jul 2;116(33):16454–62. doi: 10.1073/pnas.1900751116 (PMC6697816; doi:10.1073/pnas.1900751116), 2019-07-02
Supplement: pnas.1900751116.sapp.pdf [file pnas.1900751116.sapp.pdf]

## Supplementary Information for

Meiotic viral attenuation through an ancestral apoptotic pathway

Jie Gao<sup>1</sup>, Sabrina Chau<sup>1</sup>, Fuad Chowdhury<sup>1</sup>, Tina Zhou<sup>1</sup>, Saif Hossain<sup>1</sup>, G. Angus McQuibban<sup>2</sup>, and Marc D. Meneghini<sup>1\*</sup>

<sup>1</sup>Department of Molecular Genetics, University of Toronto, Toronto, ON, M5G 1M1, Canada

<sup>2</sup>Department of Biochemistry, University of Toronto, Toronto, ON, M5G 1M1, Canada

\*Correspondence to: [marc.meneghini@utoronto.ca](mailto:marc.meneghini@utoronto.ca)

### **This PDF file includes:**

Supplementary Materials and Methods

Figs. S1 to S4

Tables S1 to S4

Supplementary References

## Supplementary Materials and Methods

**TCA precipitation of secreted Killer toxin.** Cells were grown to saturation at 30°C in acidified YPD (pH 4.7) and removed from media by centrifugation. Residual particulates were removed from media using a 0.2 µm filter. Proteins present in the filtrate were precipitated by addition of 100% TCA to a final concentration of 10% (v/v) and incubation at 4°C for 30 minutes, followed by three acetone washes. The resulting protein pellet was resuspended in 2x SDS-PAGE sample buffer and heated at 100°C for 10 minutes for analysis by Western blotting.

**pESC plasmids.** The *pESC GALpr-NUC1::FLAG HIS3* and *pESC GALpr-NUC1-H138A::FLAG HIS3* plasmids were obtained from Frank Madeo (1). Diploid cells were transformed with the plasmids and selected on synthetic complete medium lacking histidine (SC–HIS) with 2% glucose. For tetrad analysis, diploids were sporulated and tetrads were dissected on SC–HIS with 2% galactose and incubated at 30°C for 3-4 days before genotyping. For Western blotting, cells carrying the plasmids were incubated overnight at 30°C in SC–HIS with 2% raffinose to de-repress the galactose promoter. The overnight raffinose culture was diluted in SC–HIS with 2% galactose and grown at 30°C for 6 hours to induce expression; these cells were then harvested for downstream applications.

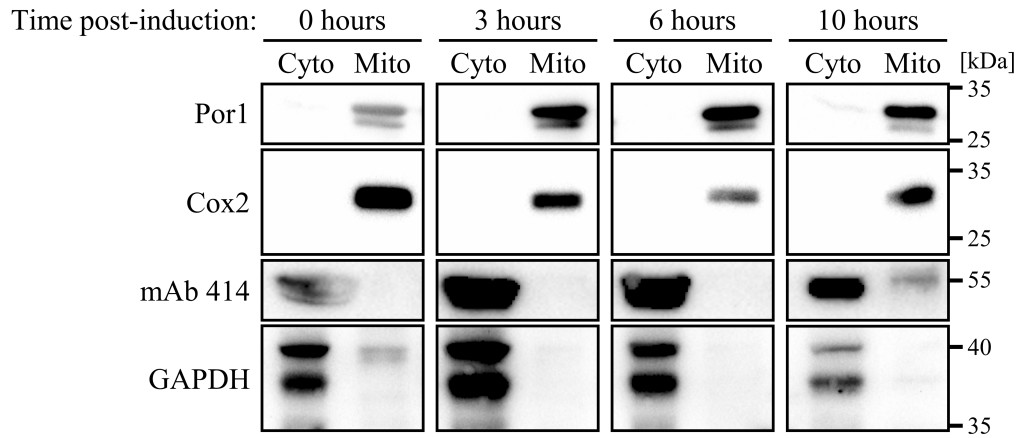

**Figure S1. Validation of subcellular fractionation approach.** Cell fractions of synchronized meiotic timecourse were probed with antibodies against additional cytosolic (GAPDH) and mitochondrial (Cox2) markers to show appropriate co-fractionation of the selected cell compartment markers. Molecular weight markers on far right. Strain used: MEY322.

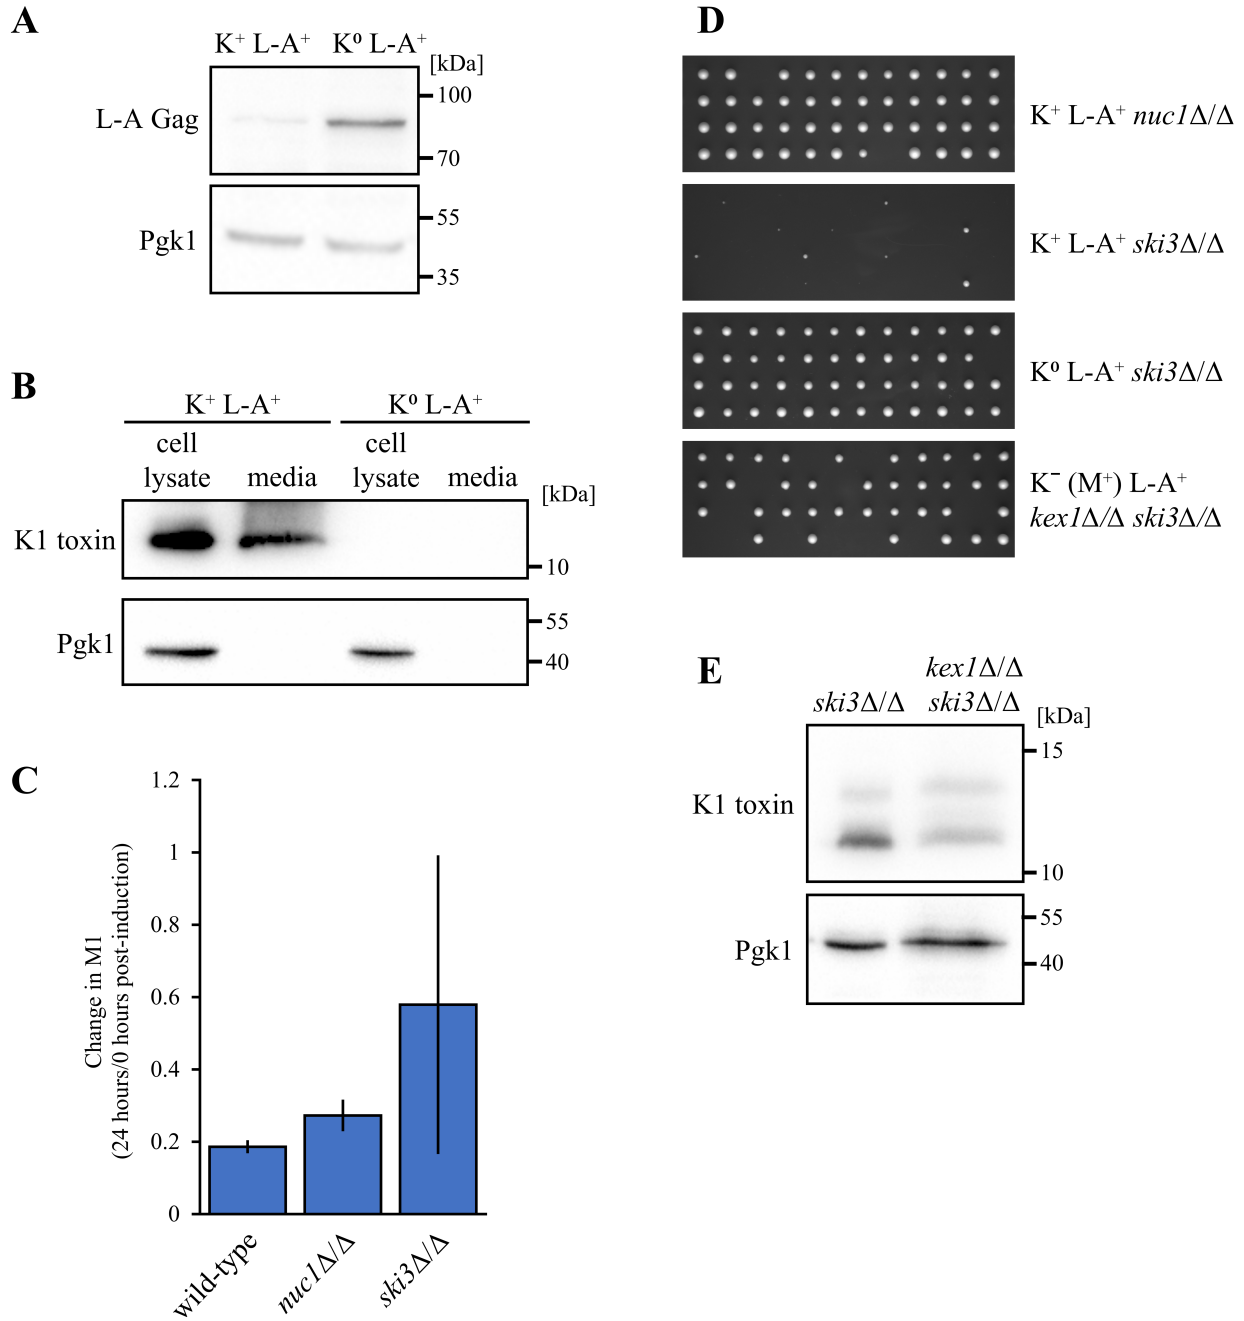

**Figure S2. Characterization of M1 and L-A interactions with each other and the host cell.**

**(A)** Anti-L-A Gag Western blot of wild-type K<sup>+</sup> L-A<sup>+</sup> and K<sup>0</sup> L-A<sup>+</sup> cell lysates sampled from saturated cultures with Pgk1 loading control.

**(B)** Anti-K1 toxin Western blots of whole-cell lysates and TCA-precipitated media taken from saturated cultures of isogenic K<sup>+</sup> L-A<sup>+</sup> and K<sup>0</sup> L-A<sup>+</sup> *ski3Δ/Δ* strains. Cells were grown in acidified media to prevent degradation of secreted K1 toxin. Pgk1 was used to confirm the



absence of cellular contamination in the precipitated media.

**(C)** Bulk *MI* RNA abundance in  $K^+ L-A^+$  strains as quantified by qPCR in terminally sporulated (24 hours post-induction) populations shown as fold change over pre-meiotic (0 hours post-induction) wild-type *MI* levels. All samples were normalized to endogenous *ACT1* mRNA. Data points represent mean of biological replicates ( $n = 4$ )  $\pm$  standard deviation.

**(D)** Homozygous mutant dissections from figure 2B shown in full. Additional panel (bottom) shows partial rescue of Killer-dependent *ski3* $\Delta/\Delta$  spore lethality by homozygous *KEX1* deletion, which segregate non-Killer spores carrying the M1 genome – annotated as  $K^- (M^+) L-A^+$ .

**(E)** Anti-K1 toxin Western blots of whole-cell lysates sampled from isogenic mutants at terminal sporulation (24 hours post-induction) with Pgk1 as loading control.

Strains used: MMY6007, MMY6018, MMY6106, MMY6117, MMY6170, MMY7464, MMY7962, MMY7974, MMY7977, MMY7978, MMY7991, MMY7992, and MMY8680.

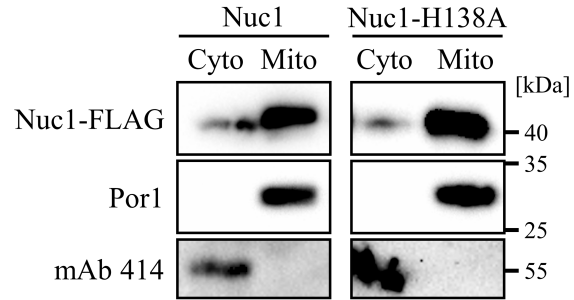

**Figure S3. Validation of plasmid-based Nuc1 and Nuc1-H138A constructs.** Anti-FLAG Western blot of mitochondrial and cytosolic cell fractions sampled from plasmid-transformed K<sup>+</sup> *nuc1Δ/+ ski3Δ/+* diploids following induction in SC–HIS+gal media for 6 hours at 30°C to confirm expression of plasmid-based Nuc1 constructs (fractionation controls included). Strains used: HGY432 and HGY433.

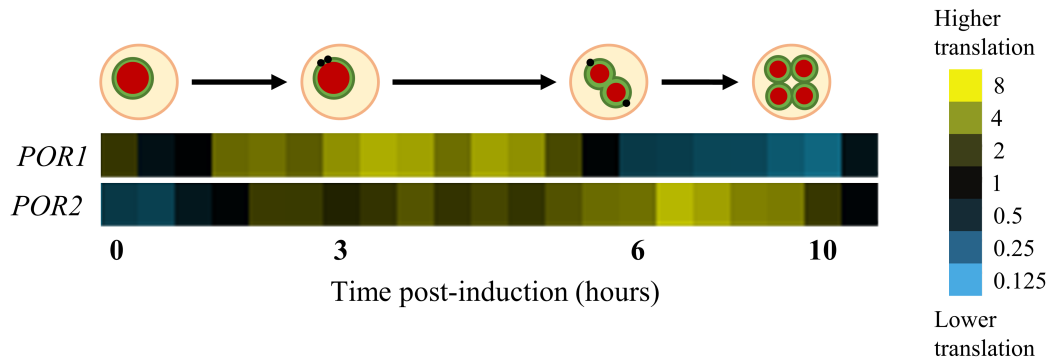

**Figure S4. Developmental regulation of *POR1* and *POR2* translation.** Meiotic ribosome profiling heatmap of *POR1* and *POR2* derived from the data set provided by Brar et al. (2) with schematic depiction of meiotic events occurring within the timeframes given. Colours indicate translational efficiency, as determined by ribosome footprints mapping to the ORF (reads per kilobase of transcript per million mapped reads, RPKM) normalized over mRNA reads mapping to the ORF (RPKM). Note that the time elapsed between each data point is not proportional to the physical distances depicted here.

**Table S1. Nuc1-mediated viral repression requires nuclease activity.**

|                                                                                                                      | <b>Nuc1</b>       | <b>Nuc1-H138A</b> |
|----------------------------------------------------------------------------------------------------------------------|-------------------|-------------------|
| K <sup>+</sup> L-A <sup>+</sup> <i>HIS</i> <sup>+</sup> <i>nuc1</i> Δ <i>ski3</i> Δ haploids recovered               | 27                | 5                 |
| Total K <sup>+</sup> L-A <sup>+</sup> <i>HIS</i> <sup>+</sup> haploids recovered                                     | 117               | 120               |
| <b>Observed frequency of K<sup>+</sup> L-A<sup>+</sup> <i>HIS</i><sup>+</sup> <i>nuc1</i>Δ <i>ski3</i>Δ haploids</b> | <b>0.23 (.25)</b> | <b>0.04 (.25)</b> |

The K<sup>+</sup> *nuc1*Δ/+ *ski3*Δ/+ parent strain was transformed with plasmids carrying galactose-inducible alleles of FLAG-tagged *NUC1* and dissected on SC–HIS+gal at 30°C. Haploids expressing wild-type Nuc1 or Nuc1-H138A were recovered from multiple independent dissections, genotyped, and counted for the data set. The bottom-most column gives the observed segregation frequency and expected segregation frequency (parenthetical) of the genotype of interest.

Strains used: HGY432 and HGY433.

**Table S2. Analysis of *POR1/POR2* genetic interactions.**

| Parent genotype                               | Genotypes recovered from dissections |                         |                         |                         |                         |                         |                         |                          | Total                   |                          |
|-----------------------------------------------|--------------------------------------|-------------------------|-------------------------|-------------------------|-------------------------|-------------------------|-------------------------|--------------------------|-------------------------|--------------------------|
|                                               | <i>por1Δ</i>                         | <i>por2Δ</i>            | <i>por1Δ por2Δ</i>      | <i>por1Δ muc1Δ</i>      | <i>por1Δ ski3Δ</i>      | <i>por2Δ muc1Δ</i>      | <i>por2Δ ski3Δ</i>      | <i>por1Δ por2Δ muc1Δ</i> |                         | <i>por1Δ por2Δ ski3Δ</i> |
| $K^+ L-A^+ por1Δ/Δ$<br><i>muc1Δ/+</i>         | 118<br><b>0.46 (.5)</b>              | –                       | –                       | 120<br><b>0.47 (.5)</b> | –                       | –                       | –                       | –                        | –                       | 238<br><b>64 tetrads</b> |
| $K^0 L-A^+ por1Δ/Δ$<br><i>ski3Δ/+</i>         | 125<br><b>0.48 (.5)</b>              | –                       | –                       | –                       | 126<br><b>0.49 (.5)</b> | –                       | –                       | –                        | –                       | 251<br><b>65 tetrads</b> |
| $K^+ L-A^+ por1Δ/Δ$<br><i>ski3Δ/+</i>         | 92<br><b>0.44 (.5)</b>               | –                       | –                       | –                       | 38<br><b>0.18 (.5)</b>  | –                       | –                       | –                        | –                       | 130<br><b>52 tetrads</b> |
| $K^+ L-A^+ por1Δ/+$<br><i>por2Δ/Δ muc1Δ/+</i> | –                                    | 56<br><b>0.28 (.25)</b> | 39<br><b>0.20 (.25)</b> | –                       | –                       | 41<br><b>0.21 (.25)</b> | –                       | 53<br><b>0.27 (.25)</b>  | –                       | 189<br><b>49 tetrads</b> |
| $K^0 L-A^+ por1Δ/+$<br><i>por2Δ/Δ ski3Δ/+</i> | –                                    | 47<br><b>0.22 (.25)</b> | 58<br><b>0.27 (.25)</b> | –                       | –                       | –                       | 58<br><b>0.27 (.25)</b> | –                        | 47<br><b>0.22 (.25)</b> | 210<br><b>53 tetrads</b> |
| $K^+ L-A^+ por1Δ/+$<br><i>por2Δ/Δ ski3Δ/+</i> | –                                    | 50<br><b>0.23 (.25)</b> | 51<br><b>0.26 (.25)</b> | –                       | –                       | –                       | 54<br><b>0.26 (.25)</b> | –                        | 2<br><b>0.01 (.25)</b>  | 157<br><b>53 tetrads</b> |

Multiple independent tetrad dissections of porin-*NUC1/SKI3* double and triple mutants were assessed for a binary growth/no growth phenotype. The number of haploids of each genotype recovered from dissections of each parental strain is given, with observed segregation frequency (bolded) and expected segregation frequency (bolded, parenthetical) provided below. A dash (–) indicates that no haploids of the given genotype were obtained from dissections of the parent. The rightmost column gives the total number of spores recovered (top). Total number of tetrads analyzed per parent strain (rightmost column, bottom) was used to calculate the observed segregation frequency.

Strains used: SCY1, SCY28, SCY73, SCY164, SCY175, and SCY178.

**Table S3. Numerical identifiers and relevant genotypes of yeast strains used in this study.**

| <b>Strains</b> | <b>Relevant genotype</b>                                                                                          | <b>Plasmids</b>                   |
|----------------|-------------------------------------------------------------------------------------------------------------------|-----------------------------------|
| HGY432         | W303 <i>MATa/α K<sup>+</sup> L-A<sup>+</sup> his3-11,15/his3-11,15 nuc1Δ::NatMX6/NUC1 ski3Δ::KanMX6/SKI3</i>      | pESC <i>NUC1(H138A)-FLAG HIS3</i> |
| HGY433         | W303 <i>MATa/α K<sup>+</sup> L-A<sup>+</sup> his3-11,15/his3-11,15 nuc1Δ::NatMX6/NUC1 ski3Δ::KanMX6/SKI3</i>      | pESC <i>NUC1-FLAG HIS3</i>        |
| MEY322         | SK1 <i>MATa/α K<sup>0</sup> L-A<sup>+</sup> NUC1-FLAG::KanMX6/NUC1-FLAG::KanMX6</i>                               |                                   |
| MEY783         | SK1 <i>MATa/α K<sup>0</sup> L-A<sup>+</sup> NUC1-FLAG::KanMX6/NUC1-FLAG::HygMX6</i>                               |                                   |
| MMY5914        | SK1 <i>MATa/α K<sup>+</sup> L-A<sup>+</sup></i>                                                                   |                                   |
| MMY5977        | SK1 <i>MATa/α K<sup>+</sup> L-A<sup>+</sup> nuc1Δ::NatMX6/NUC1 ski3Δ::HygMX6/SKI3</i>                             |                                   |
| MMY5994        | SK1 <i>MATa/α K<sup>+</sup> L-A<sup>+</sup> ura3-1/ura3-1 nuc1Δ::NatMX6/NUC1 ski3Δ::HygMX6/SKI3</i>               | p5472 <i>NUC1 CEN/ARS URA3</i>    |
| MMY6007        | SK1 <i>MATα K<sup>0</sup> L-A<sup>+</sup></i>                                                                     |                                   |
| MMY6018        | SK1 <i>MATα K<sup>+</sup> L-A<sup>+</sup></i>                                                                     |                                   |
| MMY6106        | SK1 <i>MATa/α K<sup>+</sup> L-A<sup>+</sup></i>                                                                   |                                   |
| MMY6117        | SK1 <i>MATa/α K<sup>+</sup> L-A<sup>+</sup> ski3Δ::HygMX6/ski3Δ::HygMX6</i>                                       |                                   |
| MMY6170        | SK1 <i>MATa/α K<sup>+</sup> L-A<sup>+</sup> nuc1Δ::NatMX6/nuc1Δ::NatMX6</i>                                       |                                   |
| MMY6461        | SK1 <i>MATa/α K<sup>0</sup> L-A<sup>+</sup> nuc1Δ::NatMX6/NUC1 ski3Δ::HygMX6/SKI3</i>                             |                                   |
| MMY6469        | SK1 <i>MATa K<sup>0</sup> L-A<sup>+</sup></i>                                                                     |                                   |
| MMY6470        | SK1 <i>MATa K<sup>0</sup> L-A<sup>+</sup> nuc1Δ::NatMX6</i>                                                       |                                   |
| MMY6471        | SK1 <i>MATa K<sup>0</sup> L-A<sup>+</sup> ski3Δ::NatMX6</i>                                                       |                                   |
| MMY6472        | SK1 <i>MATa K<sup>0</sup> L-A<sup>+</sup> nuc1Δ::NatMX6 ski3Δ::HygMX6</i>                                         |                                   |
| MMY7415        | SK1 <i>MATa/α K<sup>0</sup> L-A<sup>+</sup> ndt80Δ::HygMX6/ndt80Δ::HygMX6 NUC1-FLAG::KanMX6/NUC1-FLAG::KanMX6</i> |                                   |
| MMY7464        | SK1 <i>MATa/α K<sup>0</sup> L-A<sup>+</sup> ski3Δ::HygMX6/ski3Δ::HygMX6</i>                                       |                                   |
| MMY7506        | SK1 <i>MATa/α K<sup>0</sup> L-A<sup>+</sup></i>                                                                   |                                   |
| MMY7507        | SK1 <i>MATa/α K<sup>0</sup> L-A<sup>+</sup> nuc1Δ::NatMX6/nuc1Δ::NatMX6</i>                                       |                                   |

|         |                                                                                                                                           |
|---------|-------------------------------------------------------------------------------------------------------------------------------------------|
| MMY7571 | SK1 MATa/α K <sup>0</sup> L-A <sup>+</sup><br><i>por1Δ::KanMX6/por1Δ::KanMX6</i><br><i>NUC1-FLAG::HygMX6/NUC1-FLAG::HygMX6</i>            |
| MMY7572 | SK1 MATa/α K <sup>0</sup> L-A <sup>+</sup><br><i>por2Δ::NatMX6/por2Δ::NatMX6</i><br><i>NUC1-FLAG::HygMX6/NUC1-FLAG::HygMX6</i>            |
| MMY7599 | SK1 MATa/α K <sup>+</sup> L-A <sup>+</sup><br><i>NUC1-FLAG::KanMX6/NUC1-FLAG::KanMX6</i>                                                  |
| MMY7776 | SK1 MATa/α K <sup>+</sup> L-A <sup>+</sup> <i>nuc1Δ::NatMX6/NUC1</i><br><i>ski3Δ::HygMX6/SKI3 mak3Δ::KanMX6/MAK3</i>                      |
| MMY7827 | SK1 MATa K <sup>0</sup> L-A <sup>0</sup> <i>nuc1Δ::NatMX6</i><br><i>mak3Δ::KanMX6 ski3Δ::HygMX6</i>                                       |
| MMY7829 | SK1 MATa K <sup>0</sup> L-A <sup>0</sup> <i>nuc1Δ::NatMX6</i><br><i>mak3Δ::KanMX6 ski3Δ::HygMX6</i>                                       |
| MMY7839 | SK1 MATa/α K <sup>+</sup> L-A <sup>+</sup><br><i>nuc1Δ::NatMX6/nuc1Δ::NatMX6</i><br><i>ski3Δ::HygMX6/SKI3 mak3Δ::KanMX6/MAK3</i>          |
| MMY7950 | SK1 MATa K <sup>+</sup> L-A <sup>+</sup>                                                                                                  |
| MMY7951 | SK1 MATa K <sup>+</sup> L-A <sup>+</sup>                                                                                                  |
| MMY7960 | SK1 MATa/α K <sup>0</sup> L-A <sup>+</sup>                                                                                                |
| MMY7961 | SK1 MATa/α K <sup>0</sup> L-A <sup>+</sup><br><i>nuc1Δ::NatMX6/nuc1Δ::NatMX6</i>                                                          |
| MMY7962 | SK1 MATa/α K <sup>0</sup> L-A <sup>+</sup><br><i>ski3Δ::HygMX6/ski3Δ::HygMX6</i>                                                          |
| MMY7974 | SK1 MATa/α K <sup>+</sup> L-A <sup>+</sup><br><i>nuc1Δ::NatMX6/nuc1Δ::NatMX6</i>                                                          |
| MMY7977 | SK1 MATa/α K <sup>+</sup> L-A <sup>+</sup> <i>ski3Δ::HygMX6/SKI3</i>                                                                      |
| MMY7978 | SK1 MATa/α K <sup>+</sup> L-A <sup>+</sup> <i>nuc1Δ::NatMX6/NUC1</i><br><i>ski3Δ::HygMX6/SKI3</i>                                         |
| MMY7991 | SK1 MATa/α K <sup>+</sup> L-A <sup>+</sup><br><i>ski3Δ::HygMX6/ski3Δ::HygMX6</i>                                                          |
| MMY7992 | SK1 MATa/α K <sup>+</sup> L-A <sup>+</sup>                                                                                                |
| MMY8226 | SK1 MATa/α K <sup>0</sup> L-A <sup>+</sup> <i>nuc1Δ::NatMX6/NUC1</i><br><i>ski3Δ::HygMX6/SKI3</i>                                         |
| MMY8242 | SK1 MATa/α K <sup>0</sup> L-A <sup>0</sup> <i>nuc1Δ::NatMX6/NUC1</i><br><i>ski3Δ::HygMX6/SKI3</i>                                         |
| MMY8680 | SK1 MATa/α K <sup>-</sup> (M1 <sup>+</sup> ) L-A <sup>+</sup><br><i>kex1Δ::KanMX6/kex1Δ::KanMX6</i><br><i>ski3Δ::HygMX6/ski3Δ::HygMX6</i> |

|        |                                                                                                                                                |                                                        |
|--------|------------------------------------------------------------------------------------------------------------------------------------------------|--------------------------------------------------------|
| SCY1   | SK1 <i>MATa/α K<sup>+</sup> L-A<sup>+</sup> por1Δ::KanMX6/POR1<br/>por2Δ::NatMX6/por2Δ::NatMX6<br/>ski3Δ::HygMX6/SKI3</i>                      |                                                        |
| SCY28  | SK1 <i>MATa/α K<sup>0</sup> L-A<sup>+</sup> por1Δ::KanMX6/POR1<br/>por2Δ::NatMX6/por2Δ::NatMX6<br/>ski3Δ::HygMX6/SKI3</i>                      |                                                        |
| SCY41  | SK1 <i>MATa/α K<sup>+</sup> L-A<sup>+</sup> his3-1/his3-1<br/>ura3-1/ura3-1 POR1-EGFP::HIS3/POR1<br/>POR2-mCherry::URA3/POR2-mCherry::URA3</i> |                                                        |
| SCY53  | SK1 <i>MATa/α ura3-1/ura3-1</i>                                                                                                                | pME1 <i>NUC1::EGFP URA3</i><br>pRS424 <i>ADH-mtRFP</i> |
| SCY73  | SK1 <i>MATa/α K<sup>+</sup> L-A<sup>+</sup> por1Δ::KanMX6/POR1<br/>por2Δ::NatMX6/por2Δ::NatMX6<br/>nuc1Δ::NatMX6/NUC1</i>                      |                                                        |
| SCY164 | SK1 <i>MATa/α K<sup>+</sup> L-A<sup>+</sup><br/>por1Δ::KanMX6/por1Δ::KanMX6<br/>ski3Δ::HygMX6/SKI3</i>                                         |                                                        |
| SCY175 | SK1 <i>MATa/α K<sup>0</sup> L-A<sup>+</sup><br/>por1Δ::KanMX6/por1Δ::KanMX6<br/>ski3Δ::HygMX6/SKI3</i>                                         |                                                        |
| SCY178 | SK1 <i>MATa/α K<sup>+</sup> L-A<sup>+</sup><br/>por1Δ::KanMX6/por1Δ::KanMX6<br/>nuc1Δ::NatMX6/NUC1</i>                                         |                                                        |



**Table S4. Names and sequences of qPCR primers used in this study.**

| <b>Primer</b>  | <b>Sequence</b>      |
|----------------|----------------------|
| ACT1-Fwd       | TGTCACCAACTGGGACGATA |
| ACT1-Rev       | AACCAGCGTAAATTGGAACG |
| L-A 5-365      | ATCCTGGCGTTGGTATGACA |
| L-A 3-652      | ACGGTCAATGGCCTAACATC |
| M1 killer_564F | ATCAGACACAGCCGAACACA |
| M1 killer_831R | CCATTGTCCCTCATCCTCAC |

## Supplementary References

1. S. Büttner *et al.*, Endonuclease G regulates budding yeast life and death. *Mol Cell* **25**, 233-246 (2007).
2. G. A. Brar *et al.*, High-resolution view of the yeast meiotic program revealed by ribosome profiling. *Science* **335**, 552-557 (2012).
